# Supplementary material for: Psychosocial needs of adolescents living with TB in Peru and South Africa
Source: PubMed Central journal article supplement (PMC11221585; doi:10.5588/ijtldopen.23.0443), 2024-03-01
Supplement: iutld_ijtld_open_23.0443_supplementarydata1.pdf [file iutld_ijtld_open_23.0443_supplementarydata1.pdf]

## Psychosocial needs of adolescents living with TB in Peru and South Africa

**Supplementary Table S1.** Psychosocial characteristics by participant gender.

|                                                      | <b>Female<br/>(n=119)</b> | <b>Male<br/>(n=178)</b> | <b>p-value</b> |
|------------------------------------------------------|---------------------------|-------------------------|----------------|
| <b>Age (mean (SD))</b>                               | 16.6 (2.3)                | 16.6 (2.1)              | 0.9            |
| <b>Missed meals due to poverty, n (%)</b>            |                           |                         | 0.246          |
| <b>Never (0 days/week)</b>                           | 66 (55.9)                 | 84 (48.8)               |                |
| <b>Rarely (1-2 days/week)</b>                        | 20 (16.9)                 | 45 (26.2)               |                |
| <b>Sometimes (3-4 days/week)</b>                     | 18 (15.3)                 | 18 (10.5)               |                |
| <b>Often (5-6 days/week)</b>                         | 6 (5.1)                   | 8 (4.7)                 |                |
| <b>Always (7 days/week)</b>                          | 8 (6.8)                   | 17 (9.9)                |                |
| <b>Stigma score (mean (SD))</b>                      | 23.8 (8.2)                | 24.2 (8.4)              | 0.693          |
| <b>PHQ-9 (mean (SD))</b>                             | 11.0 (5.6)                | 10.0 (5.6)              | 0.137          |
| <b>AUDIT score (mean (SD))</b>                       | 1.2 (2.9)                 | 1.5 (4.4)               | 0.481          |
| <b>Sexually active, n (%)</b>                        | 41 (36.0)                 | 65 (40.6)               | 0.513          |
| <b>Caregiver support score (mean (SD))</b>           | 14.6 (5.9)                | 16.3 (4.8)              | 0.008          |
| <b>TB knowledge score (mean (SD))</b>                | 9.7 (2.6)                 | 10.5 (2.1)              | 0.002          |
| <b>Tobacco use, n (%)</b>                            | 12 (10.1)                 | 41 (23.6)               | 0.026          |
| <b>Illicit drug use within last 12 months, n (%)</b> | 17 (14.3)                 | 38 (21.3)               | 0.167          |

§ Caregiver support scale, 4 items, score range 5-25; scale assessed for internal reliability in this population (Cronbach's alpha = 0.95)

§§ TB knowledge scale, 3 items, score range 3-12; scale assessed for internal reliability in this population (Cronbach's alpha = 0.88)
